# **A chromosome-level genome assembly and annotation of a maize elite breeding line Dan340**

Yikun Zhao<sup>1,5</sup>, Yuancong Wang<sup>2,5</sup>, De Ma<sup>3,5</sup>, Guang Feng<sup>4</sup>, Yongxue Huo<sup>1</sup>, Zhihao Liu<sup>1</sup>, Ling Zhou<sup>2</sup>, Yunlong Zhang<sup>1</sup>, Liwen Xu<sup>1</sup>, Liang Wang<sup>4</sup>, Han Zhao<sup>2</sup>, Jiuran Zhao<sup>1,\*</sup>, Fengge Wang<sup>1,\*</sup>

6

F.W., J.Z. and H.Z. conceived the project; Y-K.Z. D.M. and Y.W. wrote, modified the manuscript; L.X. G.F. and L.W. performed the experiments; Y.H. L.Z. Y-L.Z. and Z.L. analyzed data. All authors read and approved the final manuscript.

10

11

<sup>1</sup> Maize Research Center, Beijing Academy of Agricultural and Forest Sciences (BAAFS)/Beijing Key Laboratory of Maize DNA Fingerprinting and Molecular Breeding

<sup>2</sup> Provincial Key Laboratory of Agrobiolgy, Institute of Crop Germplasm and Biotechnology, Jiangsu Academy of Agricultural Sciences

<sup>3</sup> Novogene Bioinformatics Institute

<sup>4</sup> Dandong Academy of Agricultural Sciences

<sup>5</sup> These authors contributed equally to this work.

\* **Correspondence:** Jiuran Zhao ([maizezhao@126.com](mailto:maizezhao@126.com)), Fengge Wang ([fenggewangmaize@126.com](mailto:fenggewangmaize@126.com))

21

## **Abstract**

**Background:** Maize is not only one of the most important crops grown worldwide for food, forage, and biofuel, but also an important model organism for fundamental

research in genetics and genomics. Owing to its importance in crop science, genetics and genomics, several reference genomes of common maize inbred line (genetic material) have been released, but some genomes of important genetic germplasm resources in maize breeding research are still lacking. The maize cultivar Dan340 is an excellent backbone inbred line of the Luda Red Cob Group with several desirable characteristics, such as disease resistance, lodging resistance, high combining ability, and wide adaptability. **Findings:** In this study, we constructed a high-quality chromosome-level reference genome for Dan340 by combining PacBio long HiFi sequencing reads, Illumina short reads and chromosomal conformational capture (Hi-C) sequencing reads. The final assembly of the Dan340 genome was 2,348.72 Mb, including 2,738 contigs and 2,315 scaffolds with N50 of 41.49 Mb and 215.35 Mb, respectively. Repeat sequences accounted for 73.40% of the genome size and 39,733 protein-coding genes were annotated. Analysis of genes in the Dan340 genome, together with those from B73, Mo17 and SK, were clustered into 27,654 gene families. There were 1,806 genes from 359 gene families that were specific to Dan340, of which many had functional gene ontology annotations relating to “porphyrin-containing compound metabolic process”, “tetrapyrrole biosynthetic process”, and “tetrapyrrole metabolic process”. **Conclusions:** The completeness and continuity of the genome were comparable to those of other important maize inbred lines. The assembly and annotation of this genome not only facilitates our understanding about of intraspecific genome diversity in maize, but also provides a novel resource for maize breeding improvement.

#### **Research Areas:**

Genetics and Genomics; Agriculture, Plant Genetics

#### **Data Description**

# 51 Background

52 Maize (*Zea mays* ssp. *mays* L., NCBI:txid381124) is one of the most important crops  
53 grown worldwide for food, forage, and biofuel, with an annual production of more  
54 than 1 billion tons [1]. Owing to rapid human population growth and economic  
55 demand, maize has been predicted to account for 45% of total cereal demand by the  
56 year 2050 [2]. In addition, it is an important model organism for fundamental research  
57 in genetics and genomics [3].

58 Because of its importance in crop science, genetics and genomics, several reference  
59 genomes of common maize inbred lines used in breeding have been released since  
60 2009 [4-8]. However, comparative genomic analyses have found that maize genomes  
61 exhibit high levels of genetic diversity among different inbred lines [1, 7, 9].

62 Meanwhile, accumulating studies have suggested that one or a few reference genomes  
63 cannot fully represent the genetic diversity of a species [7, 10, 11].

64 The maize cultivar Dan340 is an excellent backbone inbred line of the Luda Red Cob  
65 Group that has several desirable characteristics, such as disease resistance, lodging  
66 resistance, high combining ability, and wide adaptability. More than 50 maize hybrid  
67 breeds have been derived from Dan340 since 2000, and their planting area has  
68 reached 19 million ha. It is considered that Dan340 originated from a landrace in  
69 China and exhibits large genetic differences from other maize germplasms that  
70 represent the most important core maize germplasms in China [12]. Therefore, it

could serve as a model inbred line for the genetic dissection of desirable agronomic traits, combining ability, heterosis, and breeding history.

In the present study, we constructed a high-quality chromosome-level reference genome for Dan340 by combining PacBio long HiFi sequencing reads, Illumina short reads and chromosomal conformational capture (Hi-C) sequencing reads. The completeness and continuity of the genome were comparable with those of other important maize inbred lines, B73 [4], Mo17 [7], SK [13], PH207 [5], and HZS [8]. Furthermore, comparative genomic analyses were performed between Dan340 and other maize lines, and genes and gene families that were specific to Dan340 were identified. In addition, large numbers of structural variations between Dan340 and other maize inbred lines were detected. The assembly and annotation of this genome will not only facilitate our understanding of intraspecific genomic diversity in maize, but also provides a novel resource for maize breeding improvement.

#### **Plant materials and DNA sequencing**

Inbred line Dan340 (Fig. 1) was selected for genome sequencing and assembly because it is an elite maize cultivar, that plays an important role in maize breeding and genetic research. The plants were grown at 25°C in a greenhouse of the Beijing Academy of Agriculture and Forestry Sciences, Beijing, China. Fresh and tender leaves were harvested from the best-growing individual and immediately frozen in liquid nitrogen, followed by preservation at -80 °C in the laboratory prior to DNA extraction. Genomic DNA was extracted from the leaf tissue of a single plant using

the DNasecore Plant Kit (Tiangen Biotech Co., Ltd., Beijing, China). To ensure that DNA extracts were useable for all types of genomic libraries, the quality and quantity were evaluated using a NanoDrop 2000 spectrophotometer (NanoDrop Technologies, Wilmington, DE, USA) and electrophoresis on a 0.8% agarose gel, respectively.

In recent years, third-generation DNA sequencing technologies have undergone rapid technological innovation and are now widely used in genome assembly. In this study, PacBio CCS libraries were prepared using the SMRTbell Express Template Prep Kit 2.0 (Pacific Biosciences, Menlo Park, CA, USA; Ref. No. 101-685-400), following the manufacturer's protocols, and they were subsequently sequenced on the PacBio sequel II platform (Pacific Biosciences, RRID:SCR\_017990). As a result, 63.53 Gb (approximately  $27\times$  coverage) of HiFi reads was generated and used for the genome assembly.

In addition, one Illumina paired-end sequencing library, with an insert size of 350 bp, was generated using the NEB Next Ultra DNA Library Prep Kit (NEB, Ipswich, MA, USA) following the manufacturer's protocol, and it was subsequently sequenced using an Illumina HiSeq X Ten platform (Illumina, San Diego, CA, USA, RRID:SCR\_016385) at the Novogene Bioinformatics Institute, Beijing, China.

Approximately 80.66 Gb ( $\sim 34\times$ ) of Illumina sequencing data were obtained.

One Hi-C library was constructed using young leaves following previously published procedures, with slight modifications [14]. In brief, approximately 5-g leaf samples from seedling were cut into minute pieces and cross-linked by 4% formaldehyde

solution at room temperature in a vacuum for 30 min. Then, each sample was mixed with excess 2.5 M glycine to quench the crosslinking reaction for 5 min and then placed on ice for 15 min. The cross-linked DNA was extracted and then digested for 12 h with 20 units of *DpnII* restriction enzyme (NEB) at 37 °C, and the resuspended mixture was incubated at 62 °C for 20 min to inactivate the restriction enzyme. The sticky ends of the digested fragments were biotinylated and proximity ligated to form enriched ligation junctions and then ultrasonically sheared to a size of 200 - 600 bp. The biotin-labelled DNA fragments were pulled down and ligated with Illumina paired-end adapters, and then amplified by PCR to produce the Hi-C sequencing library. The library was sequenced using an Illumina HiSeq X Ten platform with 2 × 150 bp paired-end reads (Illumina, San Diego, CA, USA). After removing low-quality sequences and trimming adapter sequences, 304.37 Gb (approximately 130×) of clean data were generated and used for the genome assembly.

## Genome assembly

To obtain a high-quality genome assembly of Dan340, we employed both PacBio HiFi reads and Illumina short reads, with scaffolding informed by high-throughput chromosomal conformation capture (Hi-C).

The assembly was performed in a stepwise fashion. First, de novo assembly of the long CCS reads generated from PacBio SMRT sequencing was performed using Hifiasm [15] (RRID:SCR\_021069)(<https://github.com/chhy123/hifiasm>). A total of two SMRT cells produced 4,073,418 subreads, with an average length of 15,598 bp

and a read N50 of 15,715 bp. Generation of HiFi reads and adapter trimming were performed using PacBio SMRTLink v8.0 [16] with default parameters, followed by the deduplication of reads with pbmarkdup v0.2.0 [17] as recommended by PacBio. Next, HiFi reads were aligned to each other and assembled into genomic contigs using Hifiasm [15] with default parameters. The produced primary contigs (p-contigs) were then polished using Quiver [18] by aligning SMRT reads. Then, Pilon [19] (RRID:SCR\_014731) was used to perform the second round of error correction with short paired-end reads generated from Illumina Hiseq platforms. Subsequently, the Purge Haplotigs pipeline [20] was used to remove redundant sequences formed as a result of heterozygosity. The draft genome assembly was 2348.68 Mb, which reached a high level of continuity, with a contig N50 length of 45.11 Mb.

For Hi-C reads, to avoid reads having an artificial bias, we removed the following type of reads using HICUP software [21] (RRID:SCR\_005569)(<http://www.bioinformatics.babraham.ac.uk/projects/hicup/>): (a) Reads with  $\geq 10\%$  unidentified nucleotides (N); (b) Reads with  $> 10$  nt aligned to the adapter, allowing  $\leq 10\%$  mismatches; and (c) Reads with  $> 50\%$  bases having a phred quality  $< 5$ . The filtered Hi-C reads were aligned against the contig assemblies using BWA (version 0.7.8, RRID:SCR\_010910)(<http://bio-bwa.sourceforge.net/>). Reads were excluded from subsequent analyses if they did not align within 500 bp of a restriction site or did not uniquely map, and the number of Hi-C read pairs linking each pair of scaffolds was tabulated. ALLHiC v0.8.12 [22] was used in simple diploid

mode to scaffold the genome and optimize the ordering and orientation of each clustered group, producing a chromosome-level assembly. Juicebox Assembly Tools v1.9.8 [23] (RRID:SCR\_021172) was used to visualize and manually correct the large-scale inversions and translocations to obtain the final pseudo-chromosomes (Fig. 2). Finally, a total of 2315 scaffolds (representing 91.30% of the total length) were anchored to 10 chromosomes (Fig. 3).

The final assembly of the Dan340 genome was 2,348.72 Mb, including 2,738 contigs and 2,315 scaffolds, with N50 of 41.49 Mb and 215.35 Mb, respectively (Table 1).

### **Evaluation of assembly quality**

We assessed the quality of the assembly using several independent methods. First, the short reads obtained from the Illumina sequencing data were aligned to the final assembly using BWA version 0.7.8 [24]. Our result showed that the percent of reads mapped to the reference genome was up to 97.48%. Second, a total of 248 conservative genes existing in six eukaryotic model organisms were selected to form the core gene library for the CEGMA (Core Eukaryotic Genes Mapping Approach) [25] (RRID:SCR\_015055) evaluation. Our assembled Dan340 genome was aligned to this core gene library using TBLASTN [26] (RRID:SCR\_011822), Genewise version 2.2.0 [27] (RRID:SCR\_015054), and Geneid v1.4 [28] (RRID:SCR\_021639) software tools to evaluate its integrity. The result showed that 238 complete (95.97%) and 243 partial (97.98%) genes were detected in our assembly. Third, the completeness was assessed using the benchmarking universal single-copy orthologs (BUSCO) [29]



(RRID:SCR\_015008). The final assembly was tested against the database  
embryophyta\_odb10, which includes 1,614 conserved core genes. The result showed  
that 98.08% (1,583), 1.11 % (18), and 0.81% (13) of the plant single-copy orthologs  
were present in the assembled Dan340 genome as complete, fragmented, and missing  
genes, respectively. Fourth, the long-terminal repeat (LTR) Assembly Index (LAI)  
metric was used to evaluate assembly continuity in Dan340 and three other maize  
genomes (B73, Mo17 and SK, Fig. 4). Intact LTR retrotransposons in the four  
genomes were identified using LTRharvest v1.6.1 [30] (RRID:SCR\_018970),  
LTR\_FINDER v1.07 [31] (RRID:SCR\_015247), and LTR\_retriever v2.9.0 [32]  
(RRID:SCR\_017623). The LAI pipeline was executed using the following parameter  
settings: -t 20 -intact genome.fasta.pass.list -all genome.ltr.fasta.out. Our Dan340  
genome had a LAI score of 25.13, which was relatively high among the four maize  
genomes compared in this study. B73, Mo17, and SK produced scores of 24.94, 24.45,  
and 27.12, respectively (Fig. 4 and Table 2). A higher LAI score indicates more  
complete genome assembly because more intact LTR retrotransposons are identified,  
as in our Dan340 genome. Furthermore, whole-genome sequence alignments of  
Dan340 to the genomes of the other three maize inbred lines demonstrated that our  
assembly has highly collinear relationships with other published maize genomes (Fig.  
5). Taken together, the assessment results suggested that the Dan340 genome  
assembly was of high quality.

## Genome annotation

Repeat sequences of the Dan340 genome were annotated using both *ab initio* and homolog-based search methods. For the *ab initio* prediction, RepeatModeler v1.0.8 [33] (RRID:SCR\_015027), RepeatScout version 1.0.5 [34] (RRID:SCR\_014653), and LTR\_FINDER version 1.07 [31] were used to discover transposable elements (TEs) and to build TEs library. An integrated TEs library and a known repeat library (Rebase V15.02, homolog-based)(RRID:SCR\_021169) were subjected to RepeatMasker v3.3.0 [35] (RRID:SCR\_012954) to predict TEs. For homolog-based predictions, RepeatProteinMask was performed to detect TEs in the genome by comparing it against a TE protein database. Tandem repeats were ascertained in the genome using Tandem Repeats Finder (TRF, version 4.07b) [36] (RRID:SCR\_022193). As a result, 1723.99 Mb of repeat sequences were identified, accounting 73.40% of the genome size. Among these repeat sequences, 1,555.57 Mb were predicted-as to be long-terminal repeat (LTR) retrotransposons and 44.53 Mb were predicted-as to be DNA transposons, accounting for 66.23% and 1.60% of the genome, respectively. Furthermore, among the LTR retrotransposons, the Gypsy and Copia superfamilies comprised 23.81% and 12.75% of the genome, respectively. Thus, retrotransposons accounted for a large proportion of the-Dan340 genome, which was consistent with the genomic characteristics of other maize inbred lines (Table 2). All repetitive regions except tandem repeats were soft-masked for protein-coding gene annotation. Five *ab initio* gene prediction programs, Augustus v3.0.2 [37-39] (RRID:SCR\_008417), Genscan v1.0 [40] (RRID:SCR\_013362), Geneid v1.4 [28],

218 GlimmerHMM v3.0.2 [41] (RRID:SCR\_002654) and SNAP v2013-02-16 [42]  
219 (RRID:SCR\_007936), were used to predict genes. In addition, the protein sequences  
220 of five homologous species (*Sorghum bicolor*, *Setaria italica*, *Hordeum vulgare*,  
221 *Triticum aestivum*, and *Oryza sativa*) were downloaded from Ensembl and NCBI.  
222 Homologous sequences were aligned against the genome using TBLASTN (E-value  
223 1E-05). Genewise version 2.2.0 [27] was employed to predict gene models on the  
224 basis of the sequence alignment results.  
225 For RNA-seq prediction, fresh samples of six tissues (stem, endosperm, embryo, bract,  
226 silk, and ear tip) were collected. Total RNA was extracted from each sample using an  
227 RNeasy Pure Plant Kit (Qiagen Biotech Co., Ltd., Beijing, China). Isolated purified  
228 RNA was the template for the construction of a cDNA library, having fragment  
229 lengths of approximately 300 bp, using the NEBNext Ultra RNA Library Prep Kit for  
230 Illumina (New England Biolabs, Ipswich, MA, USA) in accordance with the  
231 manufacturer's instructions. Sequencing was performed on an Illumina HiSeq X Ten  
232 platform and 150-bp paired-end reads were generated. Raw reads were trimmed by  
233 removing adapter sequences, reads with more than 5% of unknown base calls (N), and  
234 low-quality bases (base quality less than 5,  $Q \leq 5$ ). Clean paired-end reads were  
235 aligned to the genome using Tophat version 2.0.13 [43] (RRID:SCR\_013035) to  
236 identify exon regions and splice positions. The alignment results were then used as  
237 input for cufflinks version 2.1.1 [44] (RRID:SCR\_014597) to assemble transcripts to  
238 the gene models. In addition, RNA-seq data were assembled using Trinity version

2.1.1 [45] (RRID:SCR\_013048), creating several pseudo-ESTs. These pseudo-ESTs were also mapped to the assembled genome using BLAT and gene models were predicted using PASA [46] (RRID:SCR\_014656). A weighted and non-redundant gene set was generated using EVIDENCEModeler (EVM, version 1.1.1) [47] (RRID:SCR\_014659), which merged all the gene models predicted by the above three approaches. Finally, PASA was used to adjust the gene models generated by EVM. As a result, a total of 39,733 protein-coding genes were annotated in the final set. To better understand gene functions, we used all 39,733 protein-coding genes as query against public protein databases, including NCBI non-redundant protein sequences (Nr), Swiss-Prot, Protein family (Pfam), Kyoto Encyclopedia of Genes and Genomes (KEGG), InterPro, and Gene Ontology (GO). In total, 39,646 genes (99.8%) could be annotated from these databases and 24,402 genes (61.41%) were supported by RNA-seq data. Furthermore, the gene number, gene length distribution, and exon length distribution were all comparable to those of other maize inbred lines and common crop species (Table 3).

Transfer RNA (tRNA) genes were predicted using tRNAscan-SE software v. 1.4 [48] (RRID:SCR\_010835) with the default parameters. Ribosomal RNAs (rRNAs) were annotated on the basis of their homology levels with the rRNAs of several species of higher plants using BLASTN with an E-value of  $1e-5$ . The microRNA (miRNA) and small nuclear RNA (snRNA) fragments were identified by searching the Rfam database v. 11.0 (RRID:SCR\_007891) using INFERNAL v. 1.1 software

(RRID:SCR\_011809) [49, 50]. Finally, 4,547 miRNAs, 5,963 tRNAs, 63,564 rRNAs, and 1,422 snRNAs were identified, which had average lengths of 126.79, 75.25, 309.47, and 132.10 bp, respectively (Table 4).

### **Comparative genomic analysis between Dan340 and other maize lines**

We applied the OrthoMCL pipeline [51] to identify orthologous gene families among the four maize inbred lines, including Dan340, B73, Mo17, and SK. The longest protein from each gene was selected, and the proteins with a length less than 30 amino acids were removed. Subsequently, pairwise sequence similarities between all input protein sequences were calculated using BLASTP with an E value cut-off of  $1 \times 10^{-5}$ . Markov clustering (MCL) of the resulting similarity matrix was used to define the ortholog cluster structure of the proteins, using an inflation value (-I) of 1.5 (default setting in OrthoMCL). Next, comparative analyses were performed among Dan340, B73, Mo17, and SK (Fig.-6A).

Analysis of genes in the Dan340 genome, together with those from B73, Mo17 and SK, were clustered into 27,654 gene families. Of these, 15,690 families were shared among the four maize inbred lines, representing a core set of genes across these maize genomes. There were 1,806 genes from 359 gene families that were specific to Dan340, of which many had functional gene ontology annotations relating to “protein phosphorylation”, “single-organism catabolic process”, and “pheromone binding” (Fig. 6B). In KEGG functional enrichment, the most enriched pathway of Dan340

specific genes were “antifolate resistance”, “epithelial cell signaling in helicobacter pylori infection”, and “pentose and glucuronate interconversions” (Fig. 6C). In addition, OrthoMCL was used to identify the core and dispensable gene sets on the basis of gene family. The gene families that were shared among the four inbred lines were defined as core gene families. Furthermore, gene families that were shared among three inbred lines, between two inbred lines, and those that were only present in one inbred line (private gene families) were also displayed in Fig 6D.

### **Genetic variation analysis**

To investigate the genetic variations between Dan340 and other maize inbred lines, we used PBSV version 2.2.2 [52] to detect structural variations. First, PacBio reads of B73 and Mo17 were downloaded from MaizeGDB [53], and PacBio reads of SK were obtained from the National Genomics Data Center [54]. Next, subreads were aligned to the Dan340 reference genome assembled in this study using pbmm2 to generate a bam file. Then, Samtools v1.7 [55] (RRID:SCR\_002105) was used to identify and split the bam file on the basis of chromosomes and scaffolds. Afterwards, pbsv discover was used to generate svsig result files for different chromosomes and scaffolds. The svsig files of multiple samples were then used together to perform the SV joint calling with “pbsv call”, and finally, the vcf files were obtained. The high-quality Dan340 reference genome allowed us to identify large SVs presented in different maize inbred lines. By mapping the PacBio long-reads of B73 to Dan340 genome, we identified a total of 8,289 structural variations (length longer

than 500 bp) between the two representative maize genomes, including 1,653 insertions, 6,537 deletions, 36 inversions, and 63 duplications (Table 5). Furthermore, the structural variations presented in Mo17 and SK were also detected in this study (Table 6 & 7). This dataset provides abundant variation resources for molecular improvement and breeding in maize in the future.

## Conclusions

We assembled the chromosome-level genome of the maize elite inbred line Dan340 using long CCS reads from the third-generation PacBio Sequel II sequencing platform, with scaffolding informed by chromosomal conformation capture (Hi-C). The final assembly of the Dan340 genome was 2,348.72 Mb, including 2,738 contigs and 2,315 scaffolds with N50 of 41.49 Mb and 215.35 Mb, respectively. Comparisons of the Dan340 genome with the reference genomes of three other common maize inbred lines identified 1,806 genes from 359 gene families that were specific to Dan340. In addition, we also obtained large numbers of structural variants between Dan340 and other maize inbred lines, and these may be underlying the mechanisms responsible for the phenotypic discrepancies between Dan340 and other maize varieties. Therefore, the assembly and annotation of this genome not only facilitates our understanding of the intraspecific genomic diversity in maize, but they also serve as novel resources for maize breeding improvement.

## Data Availability

The raw sequence data have been deposited in NCBI under project accession No.

PRJNA795201. Data is also available in the *GigaScience* GigaDB repository [56].

## Abbreviations

BUSCO: Benchmarking Universal Single-Copy Orthologs; Hi-C: chromosomal conformation capture; CCS: circular consensus sequencing; HiFi: long high-fidelity; CEGMA: Core Eukaryotic Genes Mapping Approach; LTR: long-terminal repeat; LAI: long-terminal repeat assembly index; TEs: transposable elements; TRF: Tandem Repeats Finder; EVM: EVIDENCEModeler; KEGG: Kyoto Encyclopedia of Genes and Genomes; GO: Gene Ontology; MCL: Markov clustering; NCBI: National Center for Biotechnology Information; PacBio: Pacific Biosciences; tRNA: Transfer RNA; rRNAs: Ribosomal RNAs; miRNA: microRNA; snRNA: small nuclear RNA;

## Competing Interests

The authors declare that they have no competing interests.

## Authors' contributions

F.W., J.Z. and H.Z. conceived the project; Y-K.Z. D.M. and Y.W. wrote, modified the manuscript; L.X. G.F. and L.W. performed the data curation; Y.H. L.Z. Y-L.Z. and Z.L. analyzed data. All authors read and approved the final manuscript.



## Acknowledgements

This research was supported by grants from the special project for the construction of scientific and technological innovation capacity of Beijing Academy of Agriculture and Forestry Sciences (NO. KJCX20200305).

## References

1. Yang N, Xu XW, Wang RR, Peng WL, Cai L, Song JM, Li W, Luo X, Niu L, Wang Y, Jin M, Chen L, Luo J, Deng M, Wang L, Pan Q, Liu F, Jackson D, Yang X, Chen LL, Yan J. (2017) Contributions of *Zea mays* subspecies *mexicana* haplotypes to modern maize. *Nat Commun.* 8, 1874.
2. Hubert B, Rosegrant M, Boekel MA, Ortiz R. (2010). The future of food: scenarios for 2050. *Crop Sci.* 50, 33-50.
3. Hake S, Ross-Ibarra J. (2015) Genetic, evolutionary and plant breeding insights from the domestication of maize. *Elife.* 4, e05861.
4. Schnable PS, Ware D, Fulton RS, Stein JC, Wei F, Pasternak S, Liang C, Zhang J, Fulton L, Graves TA, Minx P, Reily AD, Courtney L, Kruchowski SS, Tomlinson C, Strong C, Delehaunty K, Fronick C, Courtney B, Rock SM, Belter E, Du F, Kim K, Abbott RM, Cotton M, Levy A, Marchetto P, Ochoa K, Jackson SM, Gillam B, Chen W, Yan L, Higginbotham J, Cardenas M, Waligorski J, Applebaum E, Phelps L, Falcone J, Kanchi K, Thane T, Scimone A, Thane N, Henke J, Wang T, Ruppert J, Shah N, Rotter K, Hodges J, Ingenthron E, Cordes

364 M, Kohlberg S, Sgro J, Delgado B, Mead K, Chinwalla A, Leonard S, Crouse K,  
365 Collura K, Kudrna D, Currie J, He R, Angelova A, Rajasekar S, Mueller T,  
366 Lomeli R, Scara G, Ko A, Delaney K, Wissotski M, Lopez G, Campos D,  
367 Braidotti M, Ashley E, Golser W, Kim H, Lee S, Lin J, Dujmic Z, Kim W, Talag  
368 J, Zuccolo A, Fan C, Sebastian A, Kramer M, Spiegel L, Nascimento L, Zutavern  
369 T, Miller B, Ambroise C, Muller S, Spooner W, Narechania A, Ren L, Wei S,  
370 Kumari S, Faga B, Levy MJ, McMahan L, Van Buren P, Vaughn MW, Ying K,  
371 Yeh CT, Emrich SJ, Jia Y, Kalyanaraman A, Hsia AP, Barbazuk WB, Baucom  
372 RS, Brutnell TP, Carpita NC, Chaparro C, Chia JM, Deragon JM, Estill JC, Fu Y,  
373 Jeddeloh JA, Han Y, Lee H, Li P, Lisch DR, Liu S, Liu Z, Nagel DH, McCann  
374 MC, SanMiguel P, Myers AM, Nettleton D, Nguyen J, Penning BW, Ponnala L,  
375 Schneider KL, Schwartz DC, Sharma A, Soderlund C, Springer NM, Sun Q,  
376 Wang H, Waterman M, Westerman R, Wolfgruber TK, Yang L, Yu Y, Zhang L,  
377 Zhou S, Zhu Q, Bennetzen JL, Dawe RK, Jiang J, Jiang N, Presting GG, Wessler  
378 SR, Aluru S, Martienssen RA, Clifton SW, McCombie WR, Wing RA, Wilson  
379 RK. (2009) The B73 maize genome: complexity, diversity, and dynamics.  
380 Science. 326, 1112-1115.

381 5. Hirsch CN, Hirsch CD, Brohammer AB, Bowman MJ, Soifer I, Barad O,  
382 Shem-Tov D, Baruch K, Lu F, Hernandez AG, Fields CJ, Wright CL, Koehler K,  
383 Springer NM, Buckler E, Buell CR, de Leon N, Kaeppler SM, Childs KL, Mikel

384 MA. (2016) Draft Assembly of Elite Inbred Line PH207 Provides Insights into  
385 Genomic and Transcriptome Diversity in Maize. *Plant Cell*. 28, 2700-2714.

386 6. Jiao Y, Peluso P, Shi J, Liang T, Stitzer MC, Wang B, Campbell MS, Stein JC,  
387 Wei X, Chin CS, Guill K, Regulski M, Kumari S, Olson A, Gent J, Schneider KL,  
388 Wolfgruber TK, May MR, Springer NM, Antoniou E, McCombie WR, Presting  
389 GG, McMullen M, Ross-Ibarra J, Dawe RK, Hastie A, Rank DR, Ware D. (2017)  
390 Improved maize reference genome with single-molecule technologies. *Nature*.  
391 546, 524-527.

392 7. Sun S, Zhou Y, Chen J, Shi J, Zhao H, Zhao H, Song W, Zhang M, Cui Y, Dong  
393 X, Liu H, Ma X, Jiao Y, Wang B, Wei X, Stein JC, Glaubitz JC, Lu F, Yu G,  
394 Liang C, Fengler K, Li B, Rafalski A, Schnable PS, Ware DH, Buckler ES, Lai J.  
395 (2018) Extensive intraspecific gene order and gene structural variations between  
396 Mo17 and other maize genomes. *Nat Genet*. 50, 1289-1295.

397 8. Li C, Song W, Luo Y, Gao S, Zhang R, Shi Z, Wang X, Wang R, Wang F, Wang  
398 J, Zhao Y, Su A, Wang S, Li X, Luo M, Wang S, Zhang Y, Ge J, Tan X, Yuan Y,  
399 Bi X, He H, Yan J, Wang Y, Hu S, Zhao J. (2019) The HuangZaoSi Maize  
400 Genome Provides Insights into Genomic Variation and Improvement History of  
401 Maize. *Mol Plant*. 12, 402-409.

402 9. Lu F, Romay MC, Glaubitz JC, Bradbury PJ, Elshire RJ, Wang T, Li Y, Li Y,  
403 Semagn K, Zhang X, Hernandez AG, Mikel MA, Soifer I, Barad O, Buckler ES.

- 404 (2015) High-resolution genetic mapping of maize pan-genome sequence anchors.  
405 Nat Commun. 6, 6914.
- 406 10. Haberer G, Kamal N, Bauer E, Gundlach H, Fischer I, Seidel MA, Spannagl M,  
407 Marcon C, Ruban A, Urbany C, Nemri A, Hochholdinger F, Ouzunova M,  
408 Houben A, Schön CC, Mayer KFX. (2020) European maize genomes highlight  
409 intraspecies variation in repeat and gene content. Nat Genet. 52, 950-957.
- 410 11. Hufford MB, Seetharam AS, Woodhouse MR, Chougule KM, Ou S, Liu J, Ricci  
411 WA, Guo T, Olson A, Qiu Y, Della Coletta R, Tittes S, Hudson AI, Marand AP,  
412 Wei S, Lu Z, Wang B, Tello-Ruiz MK, Piri RD, Wang N, Kim DW, Zeng Y,  
413 O'Connor CH, Li X, Gilbert AM, Baggs E, Krasileva KV, Portwood JL 2nd,  
414 Cannon EKS, Andorf CM, Manchanda N, Snodgrass SJ, Hufnagel DE, Jiang Q,  
415 Pedersen S, Syring ML, Kudrna DA, Llaca V, Fengler K, Schmitz RJ,  
416 Ross-Ibarra J, Yu J, Gent JI, Hirsch CN, Ware D, Dawe RK. (2021) De novo  
417 assembly, annotation, and comparative analysis of 26 diverse maize genomes.  
418 Science. 373, 655-662.
- 419 12. Zhang R, Xu G, Li J, Yan J, Li H, Yang X. (2018) Patterns of genomic variation  
420 in Chinese maize inbred lines and implications for genetic improvement. Theor  
421 Appl Genet. 131, 1207-1221.
- 422 13. Yang N, Liu J, Gao Q, Gui S, Chen L, Yang L, Huang J, Deng T, Luo J, He L,  
423 Wang Y, Xu P, Peng Y, Shi Z, Lan L, Ma Z, Yang X, Zhang Q, Bai M, Li S, Li  
424 W, Liu L, Jackson D, Yan J. (2019) Genome assembly of a tropical maize inbred

- 425 line provides insights into structural variation and crop improvement. Nat Genet.  
426 51, 1052-1059.
- 427 14. Belton JM, McCord RP, Gibcus JH, Naumova N, Zhan Y, Dekker J. Hi-C: a  
428 comprehensive technique to capture the conformation of genomes. Methods.  
429 2012; 58, 268-276.
- 430 15. Cheng H, Concepcion GT, Feng X, Zhang H, Li H. (2021) Haplotype-resolved de  
431 novo assembly using phased assembly graphs with hifiasm. Nat Methods. 18,  
432 170-175.
- 433 16. PacBio SMRTLink. <https://www.pacb.com/support/software-downloads/>.  
434 Accessed 2021 May 16.
- 435 17. Pbamarkdup. <https://github.com/PacificBiosciences/pbamarkdup>. Accessed 2021  
436 May 16.
- 437 18. Chin CS, Alexander DH, Marks P, Klammer AA, Drake J, Heiner C, Clum A,  
438 Copeland A, Huddleston J, Eichler EE, Turner SW, Korlach J. (2013) Nonhybrid,  
439 finished microbial genome assemblies from long-read SMRT sequencing data.  
440 Nature Methods. 10, 563-569.
- 441 19. Walker BJ, Abeel T, Shea T, Priest M, Abouelliel A, Sakthikumar S, Cuomo CA,  
442 Zeng Q, Wortman J, Young SK, Earl AM. (2014) Pilon: an integrated tool for  
443 comprehensive microbial variant detection and genome assembly improvement.  
444 PLoS One. 9(11):e112963.

- 445 20. Purge Haplotigs pipeline.  
446 [https://bitbucket.org/mroachawri/purge\\_haplotigs/overview](https://bitbucket.org/mroachawri/purge_haplotigs/overview). Accessed 2021 Jun  
447 20.
- 448 21. Wingett S, Ewels P, Furlan-Magaril M, Nagano T, Schoenfelder S, Fraser P,  
449 Andrews S. (2015) HiCUP: pipeline for mapping and processing Hi-C data.  
450 F1000Res. 4:1310.
- 451 22. Zhang X, Zhang S, Zhao Q, Ming R, Tang H. (2019) Assembly of allele-aware,  
452 chromosomal-scale autopolyploid genomes based on Hi-C data. Nature Plants. 5,  
453 833-845.
- 454 23. Durand NC, Robinson JT, Shamim MS, Machol I, Mesirov JP, Lander ES, Aiden  
455 EL. (2016) Juicebox Provides a Visualization System for Hi-C Contact Maps  
456 with Unlimited Zoom. Cell Syst. 3, 99-101.
- 457 24. Li H, Durbin R. (2010) Fast and accurate long-read alignment with  
458 Burrows-Wheeler transform. Bioinformatics. 26, 589-595.
- 459 25. Parra G, Bradnam K, Korf I. (2007) CEGMA: a pipeline to accurately annotate  
460 core genes in eukaryotic genomes. Bioinformatics. 23, 1061-1067.
- 461 26. Gertz EM, Yu YK, Agarwala R, Schäffer AA, Altschul SF. (2006)  
462 Composition-based statistics and translated nucleotide searches: improving the  
463 TBLASTN module of BLAST. BMC Biol. 4:41.
- 464 27. Birney E, Clamp M, Durbin R. (2004) GeneWise and Genomewise. Genome Res.  
465 14, 988-995.

- 466 28. Alioto T, Blanco E, Parra G, Guigó R. (2018) Using geneid to Identify Genes.  
467 Curr Protoc Bioinformatics. 64, e56.
- 468 29. Simão FA, Waterhouse RM, Ioannidis P, Kriventseva EV, Zdobnov EM. (2015)  
469 BUSCO: assessing genome assembly and annotation completeness with  
470 single-copy orthologs. Bioinformatics. 31, 3210-3212.
- 471 30. Ellinghaus D, Kurtz S, Willhoeft U. (2008) LTRharvest, an efficient and flexible  
472 software for de novo detection of LTR retrotransposons. BMC Bioinformatics.  
473 9:18.
- 474 31. Xu Z, Wang H. (2007) LTR\_FINDER: an efficient tool for the prediction of  
475 full-length LTR retrotransposons. Nucleic Acids Res. 35, W265-8.
- 476 32. Ou S, Chen J, Jiang N. (2018) Assessing genome assembly quality using the LTR  
477 Assembly Index (LAI). Nucleic Acids Res. 46(21):e126.
- 478 33. RepeatModeler. <http://www.repeatmasker.org/RepeatModeler/>. Accessed 2021  
479 Aug 6.
- 480 34. Price AL, Jones NC, Pevzner PA. (2005) De novo identification of repeat  
481 families in large genomes. Bioinformatics. 21 Suppl 1, i351-8.
- 482 35. RepeatMasker. <http://www.repeatmasker.org/>. Accessed 2021 Aug 16.
- 483 36. Benson G. (1999) Tandem repeats finder: a program to analyze DNA sequences.  
484 Nucleic Acids Res. 27, 573-580.
- 485 37. Stanke M, Steinkamp R, Waack S, Morgenstern B. (2004) AUGUSTUS: a web  
486 server for gene finding in eukaryotes. Nucleic Acids Res. 32, W309-12.

487 38. Stanke M, Keller O, Gunduz I, Hayes A, Waack S, Morgenstern B. (2006)  
488 AUGUSTUS: ab initio prediction of alternative transcripts. *Nucleic Acids Res.*  
489 34, W435-9.

490 39. Stanke M, Morgenstern B. (2005) AUGUSTUS: a web server for gene prediction  
491 in eukaryotes that allows user-defined constraints. *Nucleic Acids Res.* 33,  
492 W465-7.

493 40. Burge C, Karlin S. (1997) Prediction of complete gene structures in human  
494 genomic DNA. *J Mol Biol.* 268, 78-94.

495 41. Majoros WH, Pertea M, Salzberg SL. (2004) TigrScan and GlimmerHMM: two  
496 open source ab initio eukaryotic gene-finders. *Bioinformatics.* 20, 2878-2879.

497 42. Korf I. (2004) Gene finding in novel genomes. *BMC Bioinformatics.* 5, 59.

498 43. Kim D, Pertea G, Trapnell C, Pimentel H, Kelley R, Salzberg SL. (2013)  
499 TopHat2: accurate alignment of transcriptomes in the presence of insertions,  
500 deletions and gene fusions. *Genome Biol.* 14, R36.

501 44. Trapnell C, Roberts A, Goff L, Pertea G, Kim D, Kelley DR, Pimentel H,  
502 Salzberg SL, Rinn JL, Pachter L. (2012) Differential gene and transcript  
503 expression analysis of RNA-seq experiments with TopHat and Cufflinks. *Nat*  
504 *Protoc.* 7, 562-578.

505 45. Grabherr MG, Haas BJ, Yassour M, Levin JZ, Thompson DA, Amit I, Adiconis  
506 X, Fan L, Raychowdhury R, Zeng Q, Chen Z, Mauceli E, Hacohen N, Gnirke A,  
507 Rhind N, di Palma F, Birren BW, Nusbaum C, Lindblad-Toh K, Friedman N,



508 Regev A. (2011) Full-length transcriptome assembly from RNA-Seq data without  
509 a reference genome. *Nat Biotechnol.* 29, 644-652.

510 46. Haas BJ, Delcher AL, Mount SM, Wortman JR, Smith RK Jr, Hannick LI, Maiti  
511 R, Ronning CM, Rusch DB, Town CD, Salzberg SL, White O. (2003) Improving  
512 the Arabidopsis genome annotation using maximal transcript alignment  
513 assemblies. *Nucleic Acids Research.* 31, 5654-5666.

514 47. Haas BJ, Salzberg SL, Zhu W, Pertea M, Allen JE, Orvis J, White O, Buell CR,  
515 Wortman JR. (2008) Automated eukaryotic gene structure annotation using  
516 EVIDENCEModeler and the Program to Assemble Spliced Alignments. *Genome*  
517 *Biol.* 9, R7.

518 48. Lowe TM, Eddy SR. (1997) tRNAscan-SE: a program for improved detection of  
519 transfer RNA genes in genomic sequence. *Nucleic Acids Res.* 25, 955-964.

520 49. Nawrocki EP, Kolbe DL, Eddy SR. (2009) Infernal 1.0: inference of RNA  
521 alignments. *Bioinformatics.* 25, 1335-1337.

522 50. Nawrocki EP, Eddy SR. (2013) Infernal 1.1: 100-fold faster RNA homology  
523 searches. *Bioinformatics.* 29, 2933-2935.

524 51. Li L, Stoeckert CJ Jr, Roos DS. (2003) OrthoMCL: identification of ortholog  
525 groups for eukaryotic genomes. *Genome Res.* 13, 2178-2189.

526 52. PBSV. <https://github.com/PacificBiosciences/pbsv>. Accessed 2021 Sep 11.

527 53. MaizeGDB. <https://maizegdb.org/download>. Accessed 2021 Aug 8.

54. National Genomics Data Center.

<https://ngdc.cncb.ac.cn/search/?dbId=gsa&q=CRA001371>. Accessed 2021 Aug

8.

55. Danecek P, Bonfield JK, Liddle J, Marshall J, Ohan V, Pollard MO, Whitwham

A, Keane T, McCarthy SA, Davies RM, Li H. Twelve years of SAMtools and

BCFtools. *Gigascience*. 2021 Feb 16;10(2):giab008. doi:

10.1093/gigascience/giab008.

56. Zhao Y; Wang Y; Ma D; Feng G; Huo Y; Liu Z; Zhou L; Zhang Y; Xu L; Wang

L; Zhao H; Zhao J; Wang F (2022): Supporting data for "A chromosome-level

genome assembly and annotation of a maize elite breeding line Dan340"

GigaScience Database. <http://dx.doi.org/10.5524/102221>

Figure legends

Figure 1. Ear appearances of the maize inbred lines Dan340, B73, Mo17, and SK.

Figure 2: Hi-C contact heat map displaying the inter- and intra-chromosomal

interactions in maize inbred line Dan340 genome.

Figure 3. Circos plot of genomic features. Outer-to-inner tracks indicate the following:

A, Chromosome numbers of Dan340 and B73; B, Repeat density; C, Histogram of

gene density distributions along the chromosomes; D, Histogram of GC content

distributions along the chromosomes; E, Syntenic relationships of gene pairs between

Dan340 and B73 genomes identified using the best-hit method.

549 Figure 4. Genome-wide LTR Assembly Index (LAI) scores for Dan340, B73, Mo17

550 and SK.

551 Figure 5. Pairwise comparison of genome sequences using a dot plot between the

552 Dan340 line and B73 (23,350 gene pairs), Mo17 (21,913 gene pairs), SK (23,016

553 gene pairs). The horizontal axis represents the target species, the vertical axis

554 represents the reference species, C1 – C10 represent the respective chromosomes 1 –

555 10, 0 – 35 k represent the chromosome length scale marks, which mainly reflect the

556 lengths of the chromosomes, and a point represents a pair of common genes.

557 Figure 6. Gene family analyses and core- and pan-genomes of maize. A, Comparisons

558 of gene families in Dan340, B73, Mo17, and SK. The Venn diagram illustrates shared

559 and unique gene families among the four maize inbred lines. B, Gene ontology

560 enrichment analysis of Dan340-specific genes. C, Kyoto Encyclopedia of Genes and

561 Genomes analysis of Dan340-specific genes. D, Core- and pan-genome of maize. The

562 histograms show the core-gene clusters (shared in all four genomes), dispensable gene

563 clusters (present in three or two genomes) and specific gene clusters (present only in

564 one genome).

565 Figure 1

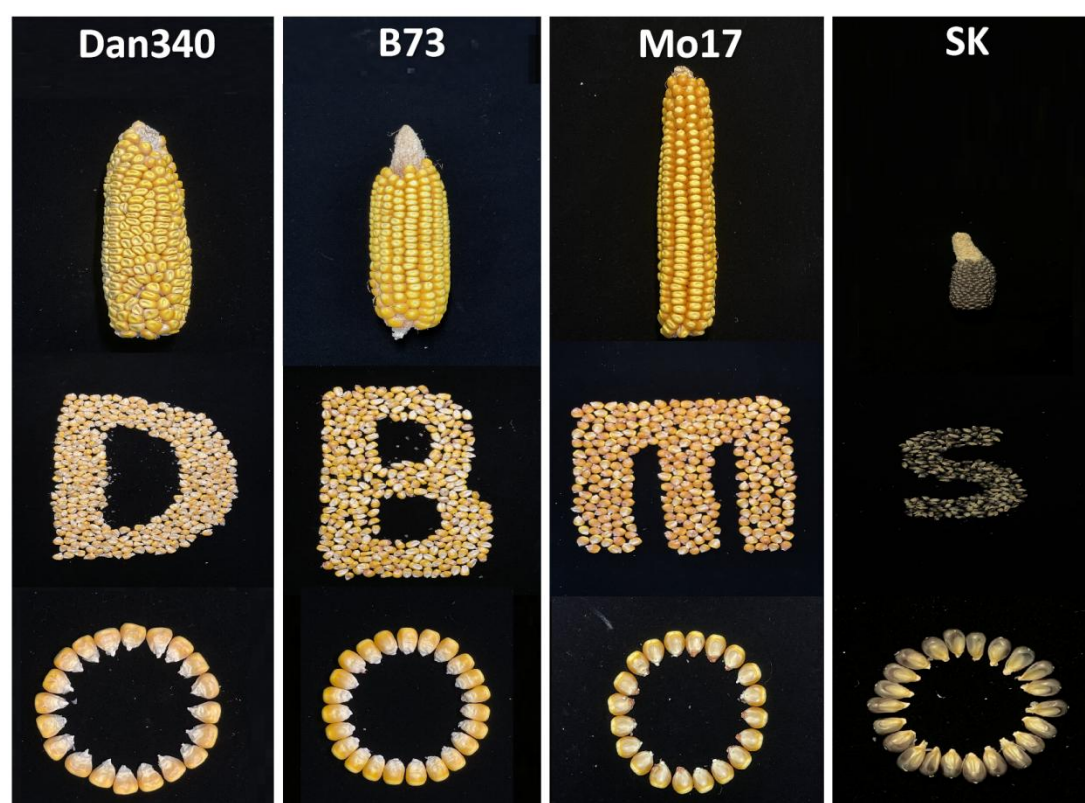

566

567

Figure 2: Hi-C contact heat map displaying the inter- and intra-chromosomal interactions in maize inbred line Dan340 genome.

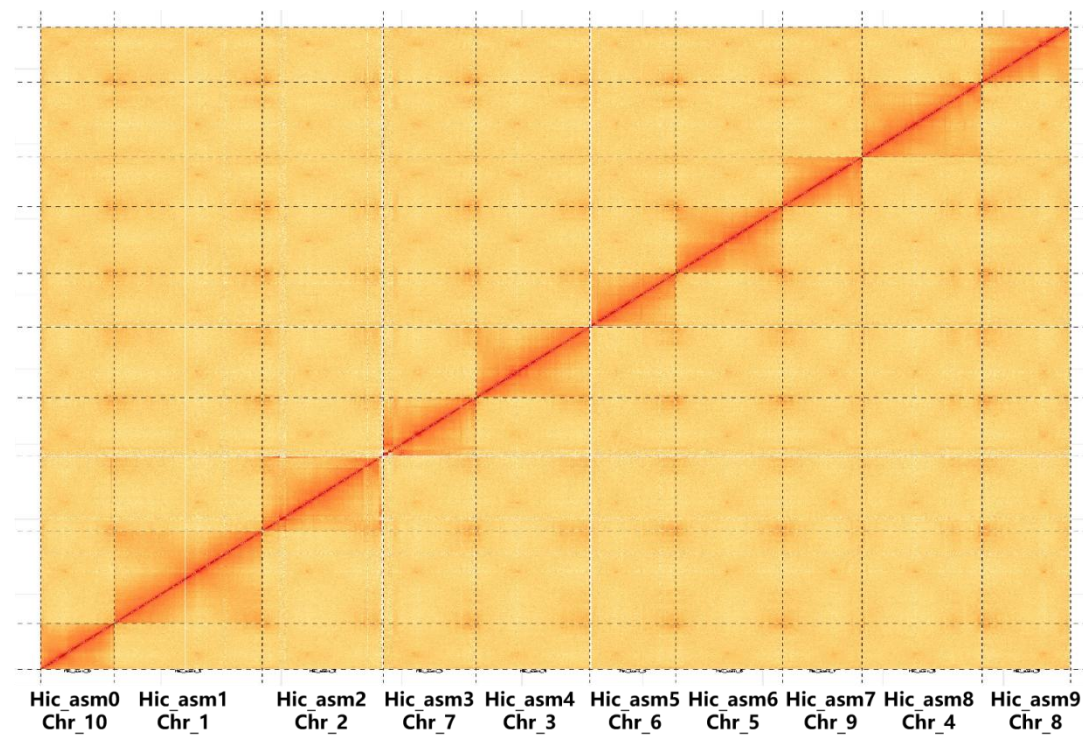



Figure 3

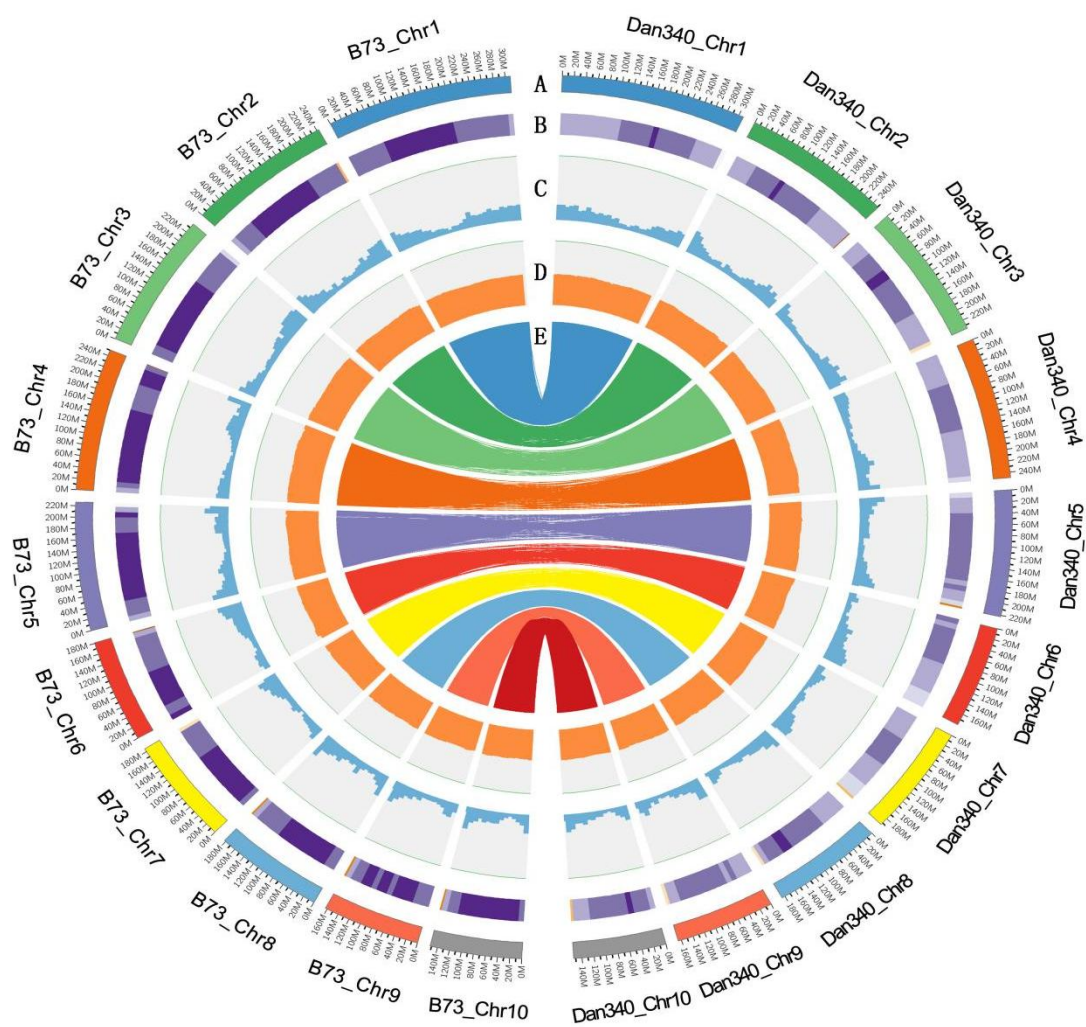

Figure 4

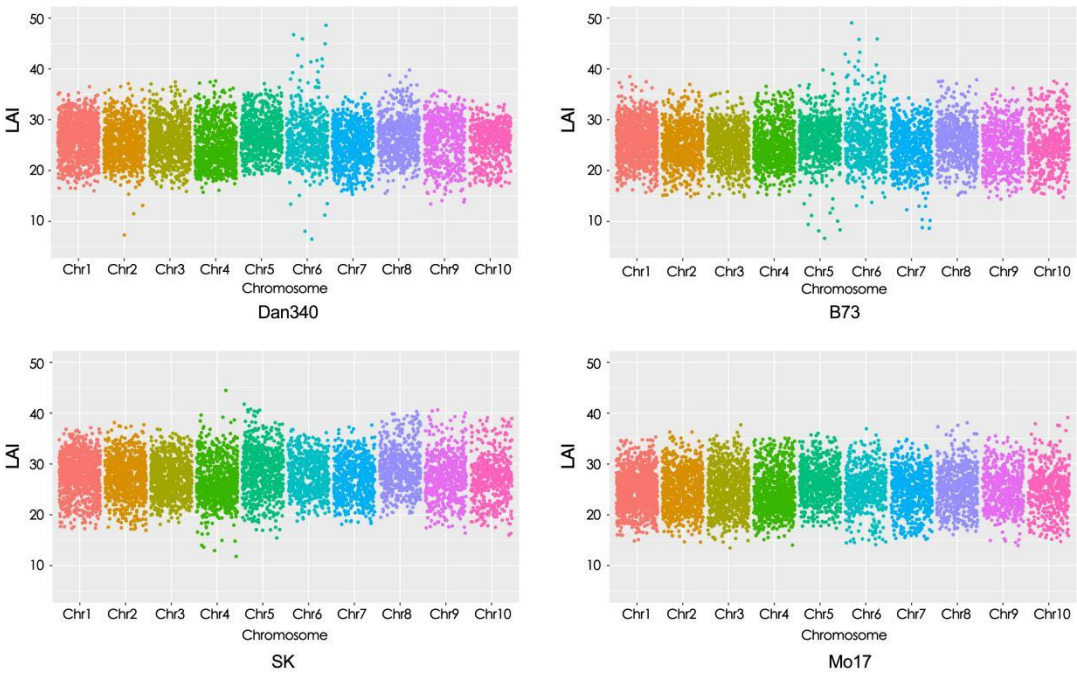

586

587

588

589 Figure 5

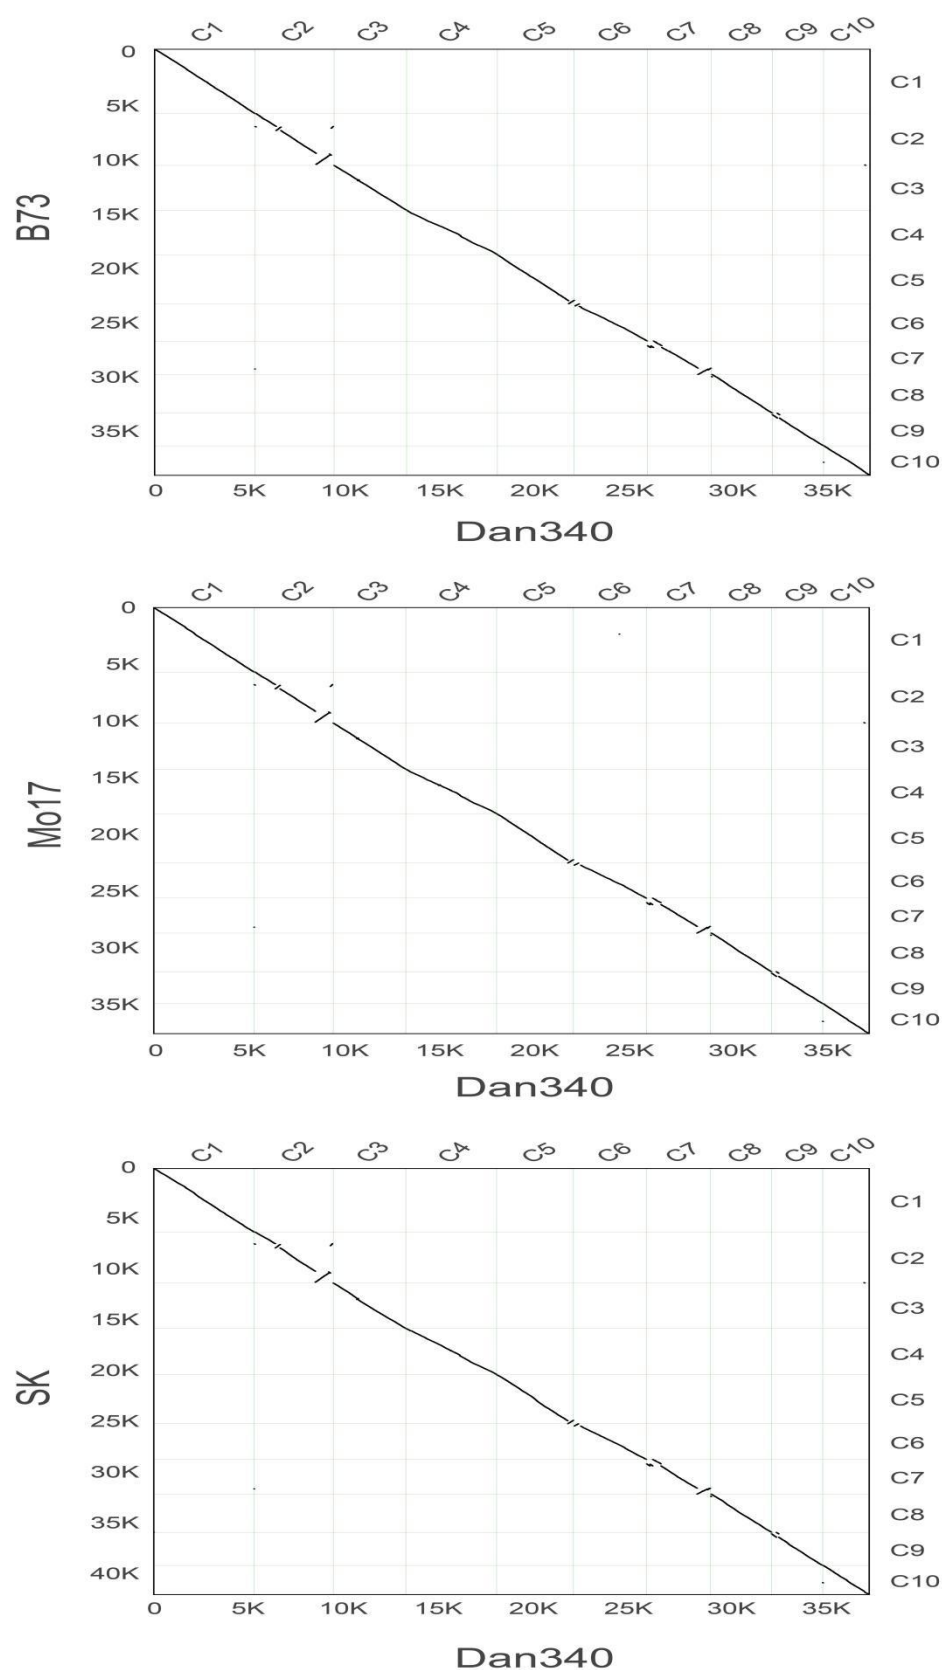



Figure 6

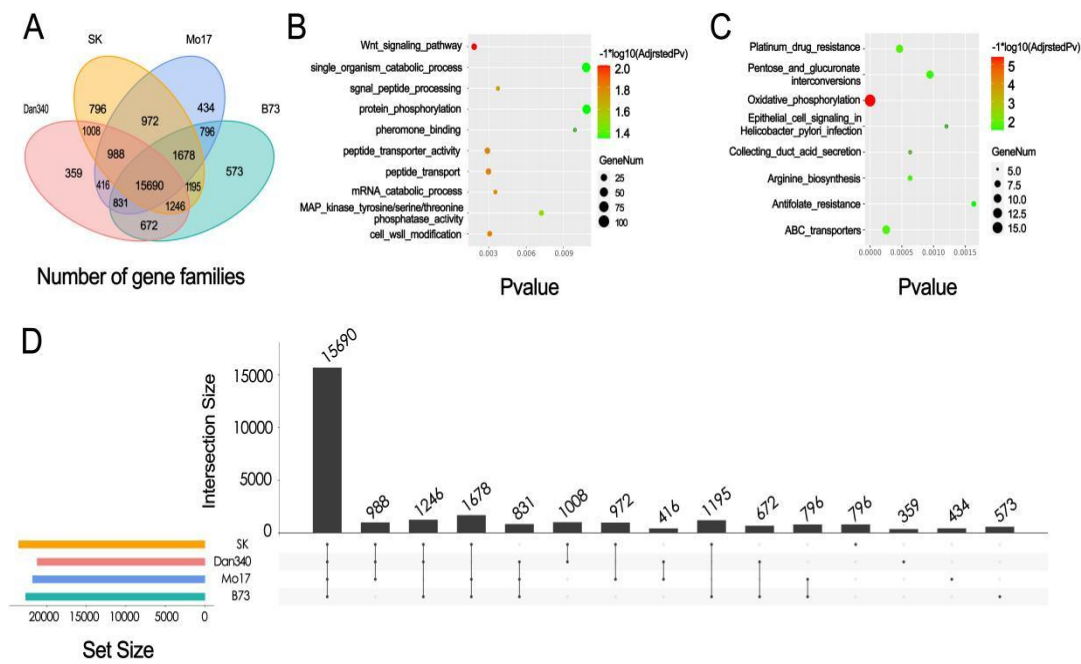

595 Table 1 Genome assembly and annotation statistics for the four tested maize inbred

596 lines.

| Genomic features               | Dan340        | B73           | Mo17          | SK            |
|--------------------------------|---------------|---------------|---------------|---------------|
| assembled genome size (bp)     | 2,348,678,871 | 2,182,075,994 | 2,104,465,715 | 2,161,392,594 |
| Number of scaffolds            | 2315          | 687           | 2203          | 671           |
| Total length of scaffolds (Mb) | 2,348.72      | 2,182         | 2,182         | 2,162         |
| Scaffold N50                   | 222,765,871   | 226,353,449   | 220,382,597   | 73,237,962    |
| Number of contigs              | 2,738         | 1,395         | 9,040         | 1,090         |
| Total length of contigs (Mb)   | 2,144,444     | 2,178,268     | 2,147,495     | 2,150,874     |
| Contig N50                     | 45,109,016    | 47,037,903    | 1,491,782     | 15,776,512    |
| Number of genes                | 39,733        | 39,756        | 38,620        | 43,271        |

597

598

Table 2. LAI scores of the four tested maize inbred lines.

| Lines | D340-Dan340 | B73   | Mo17  | SK    |
|-------|-------------|-------|-------|-------|
| LAI   | 25.13       | 24.94 | 24.45 | 27.12 |

600

601

Table 3 Summary statistics of annotated protein-coding genes in Dan340 and other maize inbred lines and common crop species.

|         |         | Average    | Average    | Average   | Average    | Average    |
|---------|---------|------------|------------|-----------|------------|------------|
| Species | Number  | transcript | CDS        | exons per | exon       | intron     |
|         |         | length(bp) | length(bp) | gene      | length(bp) | length(bp) |
| Dan340  | 39,733  | 3,793.47   | 1,140.91   | 4.69      | 243.47     | 719.61     |
| B73     | 39756   | 3511.78    | 1102.11    | 4.58      | 240.64     | 673.10     |
| Mo17    | 38620   | 3362.68    | 1140.26    | 4.69      | 242.98     | 601.83     |
| SK      | 42942   | 3857.18    | 1179.17    | 4.83      | 243.93     | 698.48     |
| Hvu     | 24,286  | 2,116.13   | 1,093.77   | 4.1       | 267.02     | 330.19     |
| Osa     | 35,679  | 2,165.58   | 991.55     | 3.78      | 262.57     | 422.87     |
| Sbi     | 34,008  | 2,626.44   | 1,164.14   | 4.31      | 270.09     | 441.76     |
| Sit     | 27,233  | 2,982.22   | 1,336.29   | 5.14      | 260.2      | 397.98     |
| Tae     | 103,539 | 3,087.61   | 1,277.31   | 4.51      | 283.23     | 515.78     |

Abbreviations: Hvu: *Hordeum vulgare*; Osa: *Oryza sativa*; Sbi: *Sorghum bicolor*; Sit: *Setaria italica*; Tae: *Triticum aestivum*.

Table 4. Annotation statistics of non-coding RNAs in the Dan340 genome using different databases.

|       |          | Type   | Copy(w*) | Average<br>length(bp) | Total<br>length(bp) |
|-------|----------|--------|----------|-----------------------|---------------------|
|       | miRNA    | 4,547  | 126.79   | 576,516               | 0.024546            |
|       | tRNA     | 5,963  | 75.25    | 448,705               | 0.019104            |
|       | rRNA     | 63,564 | 309.47   | 19,671,118            | 0.84                |
|       | 18S      | 6,607  | 1,727.38 | 11,412,778            | 0.49                |
| rRNA  | 28S      | 25,188 | 143.61   | 3,617,315             | 0.15                |
|       | 5.8S     | 25,181 | 153.48   | 3,864,710             | 0.16                |
|       | 5S       | 6,588  | 117.84   | 776,315               | 0.033053            |
|       | snRNA    | 1,422  | 132.1    | 187,845               | 0.007998            |
|       | CD-box   | 647    | 103.2    | 66,768                | 0.002843            |
| snRNA | HACA-box | 123    | 126.27   | 15,531                | 0.000661            |
|       | splicing | 651    | 161.72   | 105,278               | 0.004482            |

614 Table 5 Structural variations between Dan340 and B73.

| Chr.<br>Number | Insertion |                | Deletion |                | Inversion |                | Duplication |                |
|----------------|-----------|----------------|----------|----------------|-----------|----------------|-------------|----------------|
|                | Number    | Length<br>(bp) | Number   | Length<br>(bp) | Number    | Length<br>(bp) | Number      | Length<br>(bp) |
| 1              | 266       | 432723         | 998      | 13194452       | 7         | 120136         | 8           | 311433         |
| 2              | 183       | 316530         | 743      | 10075332       | 7         | 177706         | 9           | 261774         |
| 3              | 201       | 381536         | 838      | 11475573       | 5         | 24457          | 7           | 37754          |
| 4              | 183       | 303142         | 698      | 9809218        | 2         | 113807         | 7           | 255958         |
| 5              | 181       | 330690         | 651      | 9519227        | 3         | 108429         | 6           | 121490         |
| 6              | 122       | 252117         | 527      | 7723482        | 3         | 55199          | 8           | 300610         |
| 7              | 140       | 226942         | 512      | 7146020        | 2         | 49011          | 4           | 122886         |
| 8              | 140       | 204697         | 577      | 7720113        | 1         | 80400          | 3           | 42148          |
| 9              | 121       | 219627         | 569      | 7539785        | 3         | 17955          | 9           | 114595         |
| 10             | 116       | 209091         | 424      | 6256310        | 3         | 130724         | 2           | 40306          |

615

616

617

618

619

620

621

622

623

624

625

626

627

628 Table 6 Structural variations between Dan340 and Mo17.

| Chr. | Insertion |             | Deletion |             | Inversion |             | Duplication |             |
|------|-----------|-------------|----------|-------------|-----------|-------------|-------------|-------------|
|      | Number    | Length (bp) | Number   | Length (bp) | Number    | Length (bp) | Number      | Length (bp) |
| 1    | 171       | 226204      | 1049     | 14591535    | 10        | 223256      | 6           | 157653      |
| 2    | 102       | 164536      | 668      | 9437198     | 4         | 40341       | 5           | 149456      |
| 3    | 121       | 196809      | 767      | 11363033    | 0         | 0           | 4           | 26512       |
| 4    | 96        | 146230      | 628      | 8996741     | 3         | 50713       | 10          | 169360      |
| 5    | 102       | 147883      | 660      | 9449523     | 3         | 190422      | 7           | 85046       |
| 6    | 75        | 101725      | 567      | 8423089     | 3         | 130693      | 3           | 20573       |
| 7    | 84        | 119614      | 521      | 7784957     | 4         | 159203      | 6           | 275006      |
| 8    | 83        | 123397      | 603      | 8751739     | 2         | 30781       | 5           | 214099      |
| 9    | 61        | 83589       | 529      | 7194721     | 1         | 10328       | 3           | 55228       |
| 10   | 75        | 126350      | 497      | 6832836     | 5         | 227243      | 4           | 159642      |

629

630

631

632

633

634

635

636

637

638

639

640

Table 7 Structural variations between Dan340 and SK.

| Chr.   | Insertion |             | Deletion |             | Inversion |             | Duplication |             |
|--------|-----------|-------------|----------|-------------|-----------|-------------|-------------|-------------|
| Number | Number    | Length (bp) | Number   | Length (bp) | Number    | Length (bp) | Number      | Length (bp) |
| 1      | 244       | 355348      | 1226     | 17656467    | 15        | 228724      | 16          | 404487      |
| 2      | 133       | 220966      | 842      | 12542190    | 6         | 244805      | 5           | 76672       |
| 3      | 173       | 286569      | 894      | 12961969    | 4         | 7657        | 6           | 96601       |
| 4      | 211       | 338458      | 1012     | 14231859    | 3         | 70762       | 14          | 315182      |
| 5      | 160       | 248233      | 786      | 10660145    | 8         | 280670      | 5           | 206286      |
| 6      | 93        | 118612      | 588      | 8923936     | 4         | 55606       | 2           | 1760        |
| 7      | 115       | 175971      | 622      | 8865791     | 1         | 30856       | 9           | 233675      |
| 8      | 143       | 210185      | 685      | 10443437    | 2         | 3061        | 6           | 152412      |
| 9      | 114       | 186005      | 647      | 8682441     | 4         | 9595        | 7           | 37664       |
| 10     | 109       | 159668      | 559      | 8726188     | 4         | 132337      | 4           | 95237       |
